# Supplementary material for: Dual functional hetero-anthracene based single component organic ionic conductors as redox mediator cum light harvester for solid state photoelectrochemical cells
Source: Royal Society of Chemistry journal article supplement (doi:10.1039/c8ta00304a), 2018-01-01
Supplement: c8ta00304a1.pdf [file c8ta00304a1.pdf]

## Supporting Information

### **Dual Functional Hetero-anthracene Based Single Component Organic Ionic Conductors as Redox Mediator cum Light Harvester for Solid State Photoelectrochemical Cells**

*Jayraj V. Vaghasiya,<sup>a</sup> Keval K. Sonigara,<sup>b</sup> Saurabh S. Soni,<sup>\*b</sup> Swee Ching Tan<sup>\*a</sup>*

| <b>No.</b> | <b>Contents</b>                                                                    | <b>Figure/Table/Scheme</b> |
|------------|------------------------------------------------------------------------------------|----------------------------|
| 1          | <sup>1</sup> H & <sup>13</sup> C NMR spectra of SOIC-1                             | <b>Fig. S1</b>             |
| 2          | <sup>1</sup> H & <sup>13</sup> C NMR spectra of SOIC-2                             | <b>Fig. S2</b>             |
| 3          | Energy level diagram of ss-DSSCs with SOICs                                        | <b>Scheme. S1</b>          |
| 4          | Cyclic voltammetry measured with dye sensitized TiO <sub>2</sub> working electrode | <b>Fig. S3</b>             |
| 5          | Different thickness of SOICs vs conductivity                                       | <b>Fig. S4</b>             |
| 6          | Raman Spectra of SOIC-1 and 2                                                      | <b>Fig. S5</b>             |
| 7          | Steady-state voltammetry of SOICs and BIMl electrolyte                             | <b>Fig. S6</b>             |
| 8          | Optimized bond length of SOICs and BIMl                                            | <b>Fig. S7/Table 1</b>     |
| 9          | Mulliken charge of individual atoms for SOICs and BIMl                             | <b>Fig. S8</b>             |
| 10         | UV-Vis spectra obtained from TD-DFT calculations                                   | <b>Fig. S9 (a-c)</b>       |
| 11         | I-V characteristics of 12µm thick TiO <sub>2</sub> photoanode in ss-DSSCs          | <b>Fig. S10</b>            |
| 12         | Solid cyclic voltammetry of SOIC-1 and SOIC-2                                      | <b>Fig. S11</b>            |
| 13         | Molar extinction coefficient of SK-3 dye and SOICs                                 | <b>Table S2</b>            |
| 14         | Influence of illumination on the I-V characteristics of ss-DSSC with SOIC-1 and 2. | <b>Fig. S12</b>            |
| 15         | Photovoltaic parameters of ss-DSSCs at different illumination Intensities          | <b>Table S3</b>            |
| 16         | OCVD of SOICs and BIMl                                                             | <b>Fig. S13</b>            |

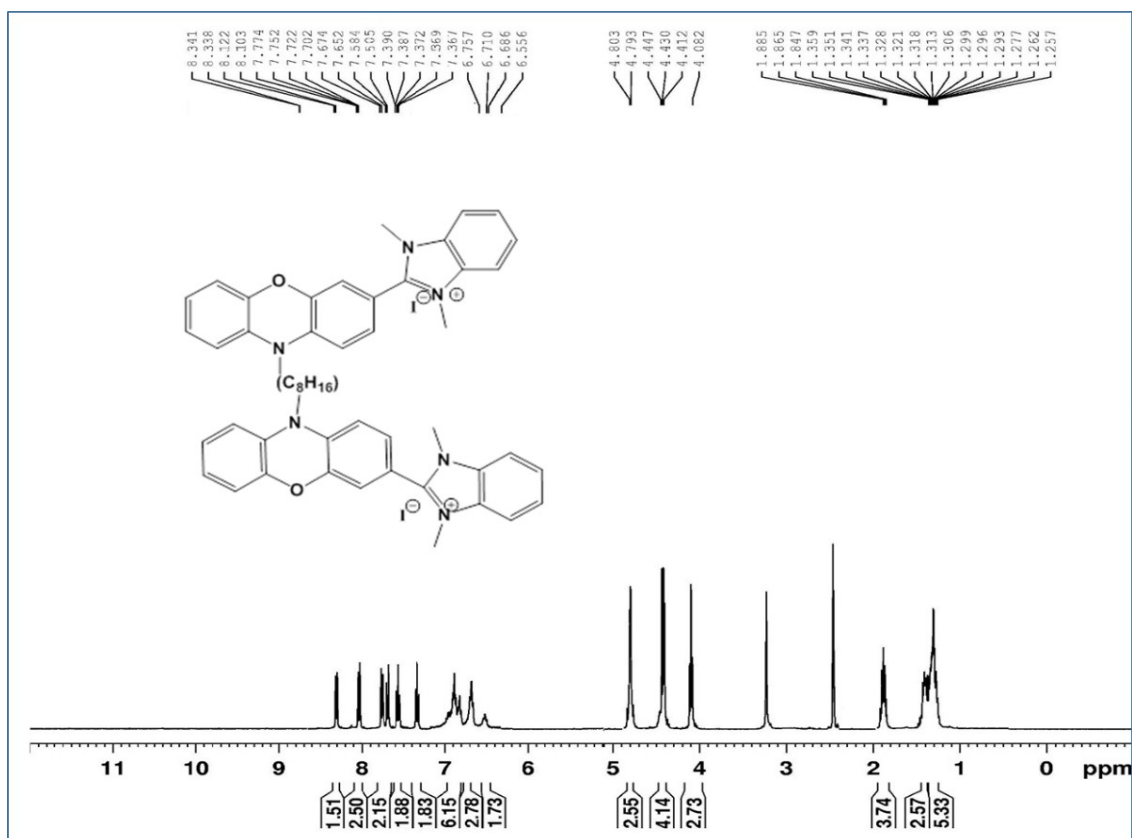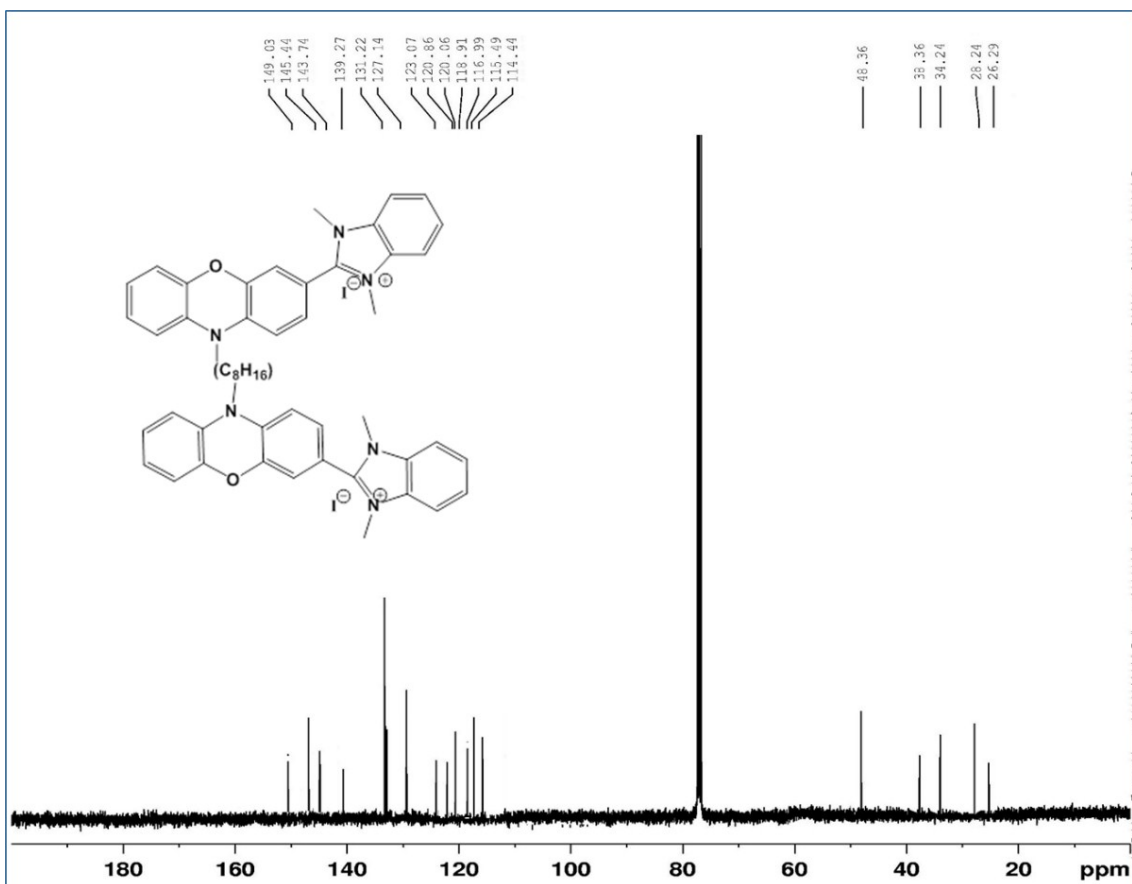

**Fig. S1.** <sup>1</sup>H and <sup>13</sup>C NMR spectra of SOIC-1

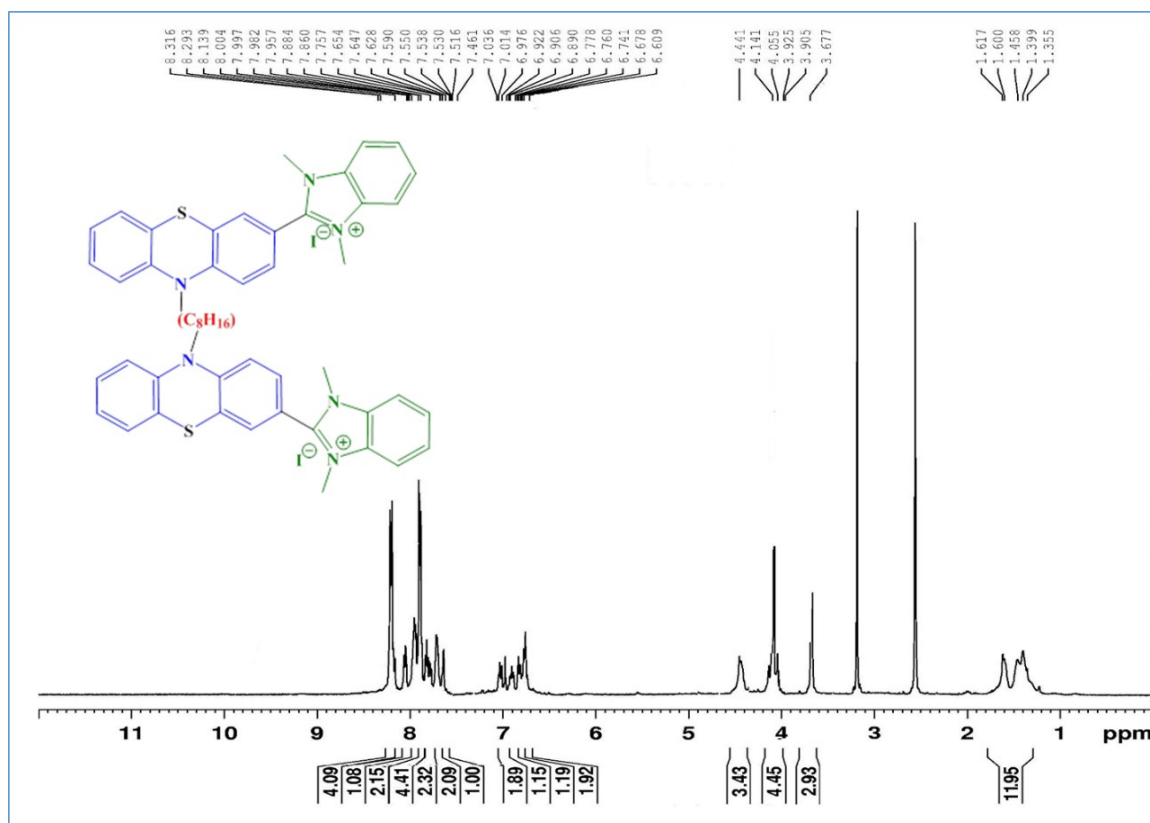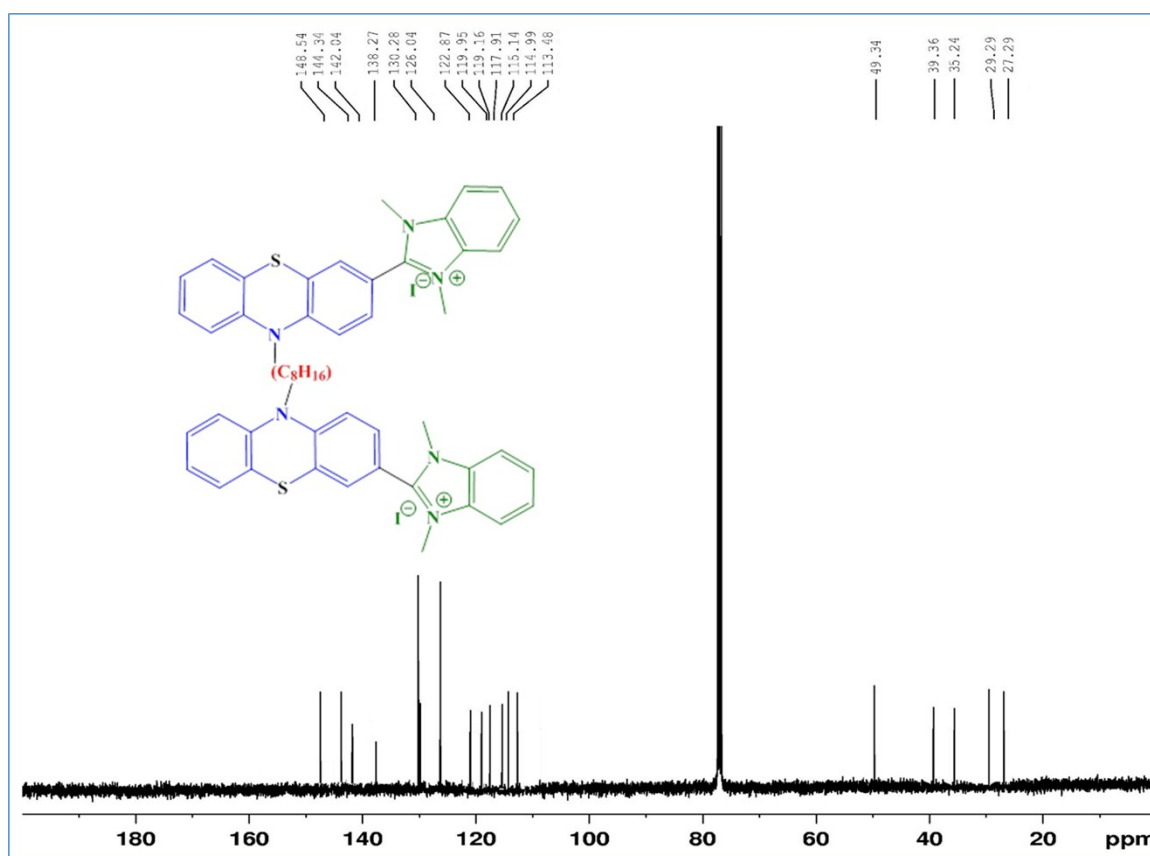

Fig. S2. <sup>1</sup>H and <sup>13</sup>C NMR spectra of SOIC-2

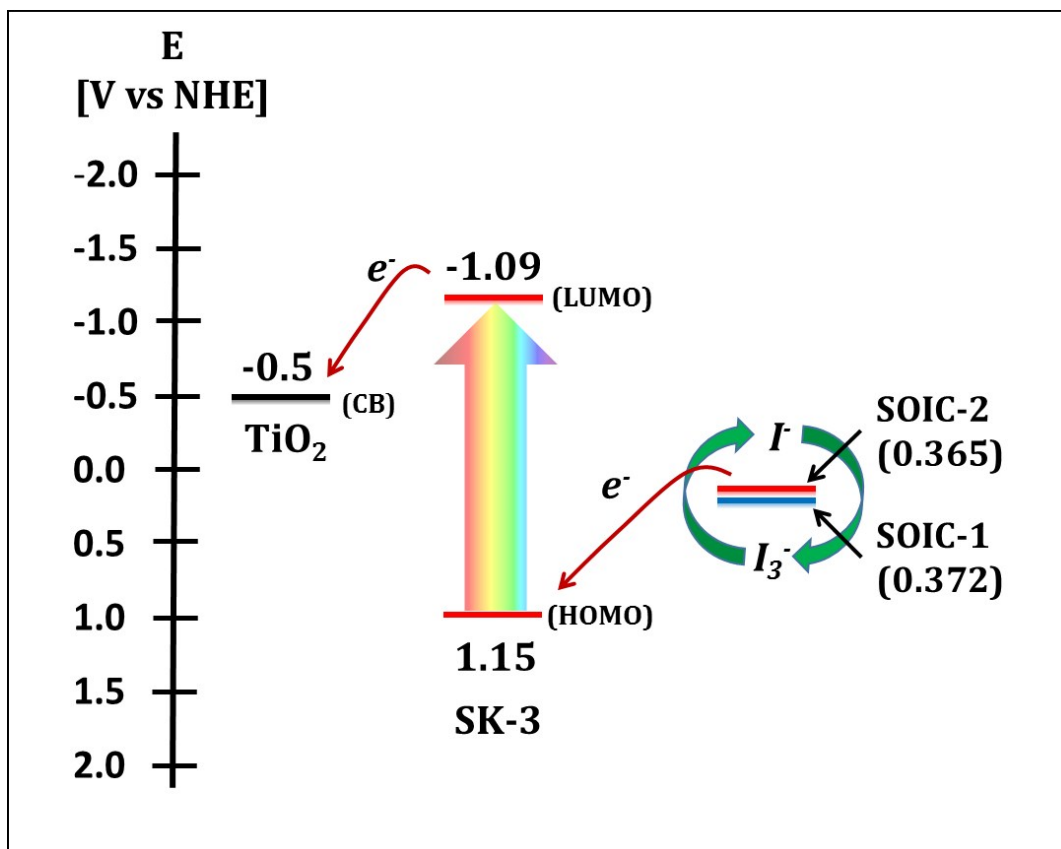

**Scheme S1.** Energy level diagram of SOICs electrolyte based solid state photo-electrochemical cells.

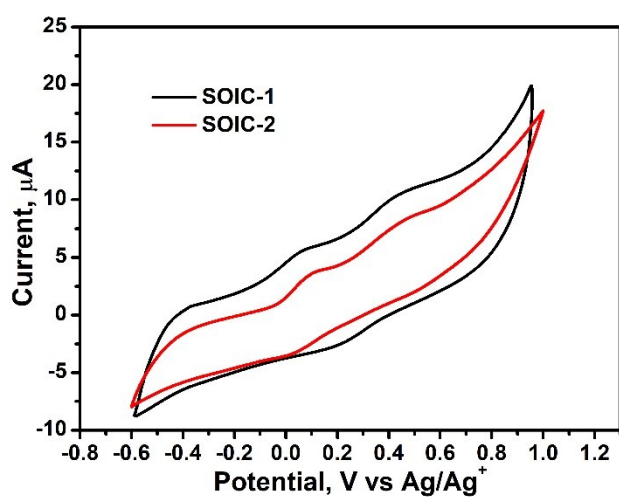

**Fig. S3.** Cyclic voltammetry was carried out using SK3 dye sensitized TiO<sub>2</sub> film as a working electrode.

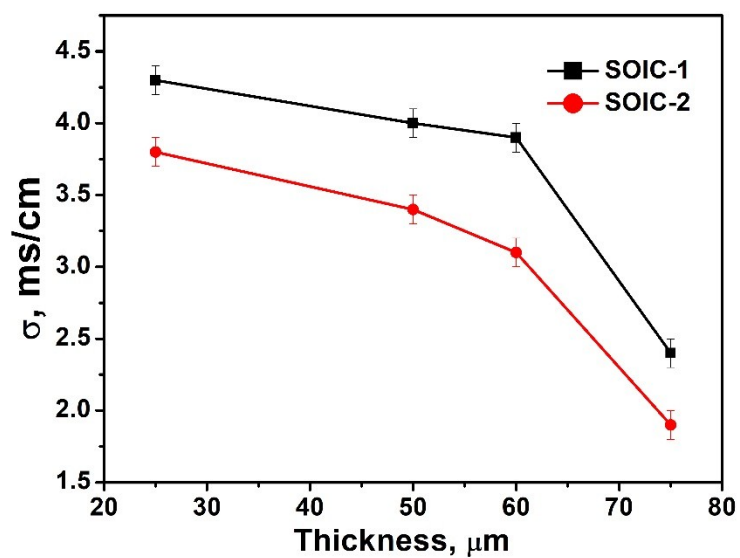

Fig. S4. Different thickness of SOICs vs conductivity at 25°C

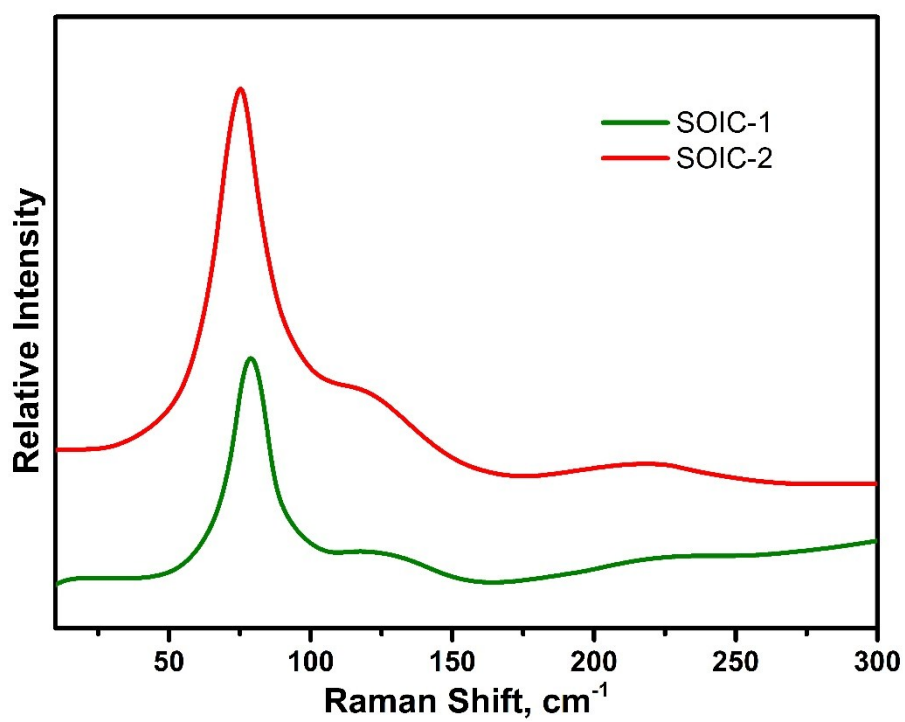

Fig. S5. Raman spectroscopy of SOIC-1 and 2.

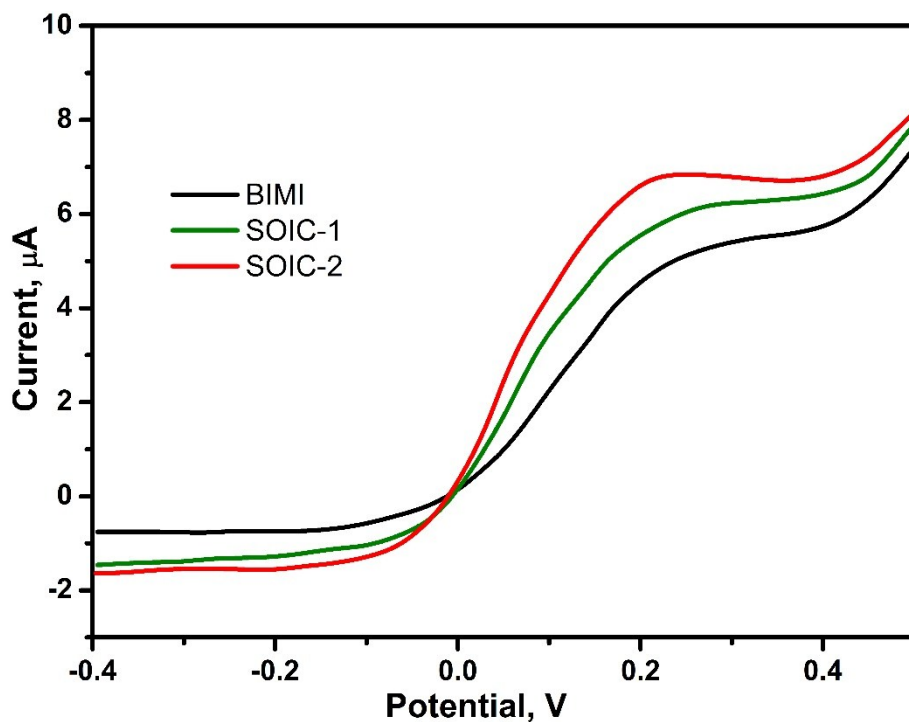

Fig. S6. Steady-state voltammety of SOICs and BIMI electrolyte

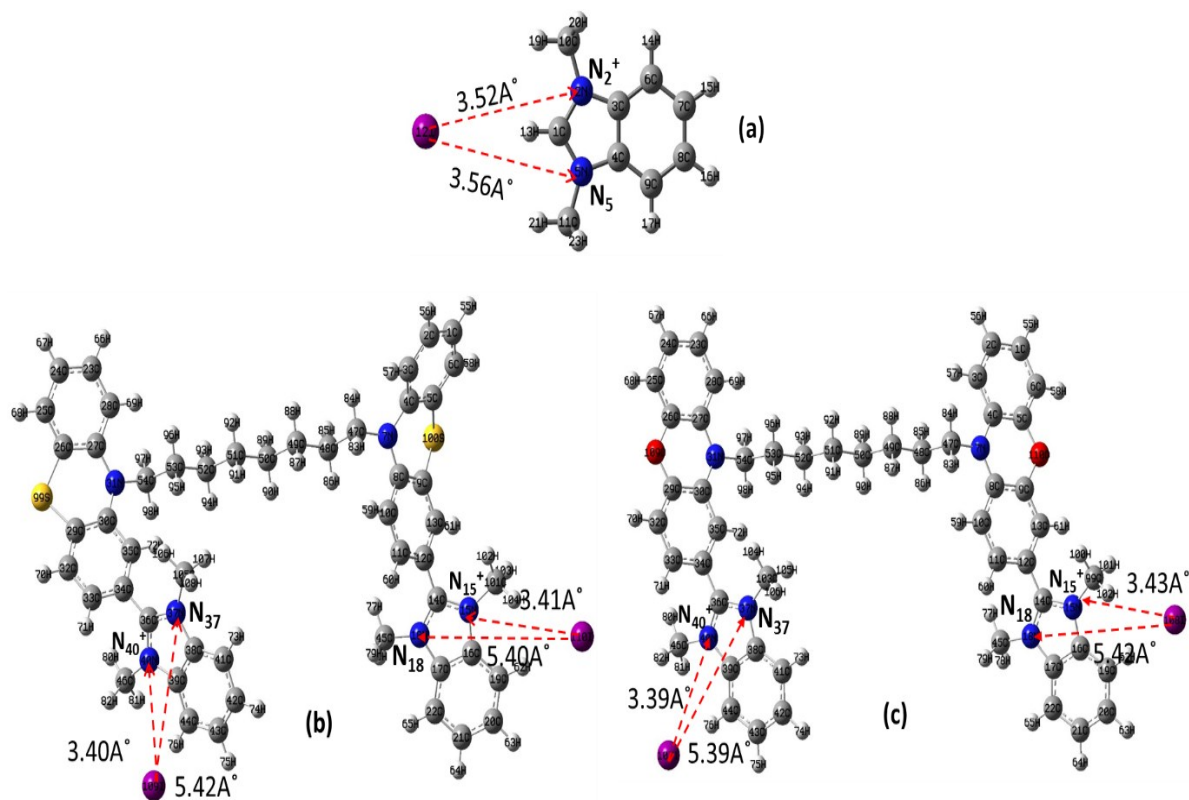

Fig. S7. Computationally optimized structure of (a) BIMI, (b) SOIC-1 and (c) SOIC-2.

**Table S1.** The optimized structure bond length of N-C, N-I, N-C-N and dihedral angles of BIMl cation with PTZ/POZ donor moieties (C13-C12-C14 and C35-C34-C36).

| Parameters   | SOIC-1 (°A) | SOIC-2 (°A) |
|--------------|-------------|-------------|
| C14-N15      | 1.36        | 1.36        |
| C14-N18      | 1.36        | 1.36        |
| C36-N40      | 1.36        | 1.36        |
| C36-N37      | 1.36        | 1.36        |
| -C12-C14-N15 | 125.67      | 125.14      |
| -C34-C36-N37 | 125.89      | 125.16      |
| N15-C14-N18  | 108.59      | 107.60      |
| N37-C36-N40  | 108.78      | 108.20      |
| N15-I110     | 3.41        | 3.43        |
| N18-I110     | 5.40        | 5.42        |
| N40-I109     | 3.40        | 3.39        |
| N37-I109     | 5.42        | 5.39        |

### Mulliken charge of BIMl

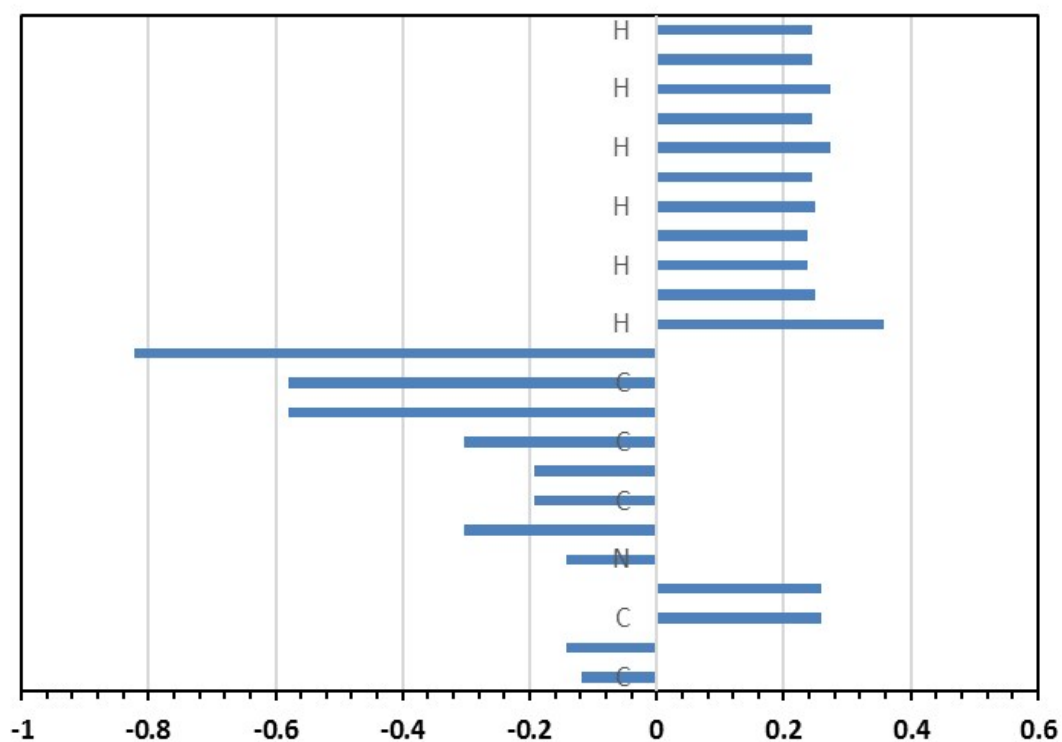

Fig. S8(a). Mulliken charge of BIMl

Mulliken charge of SOIC-1

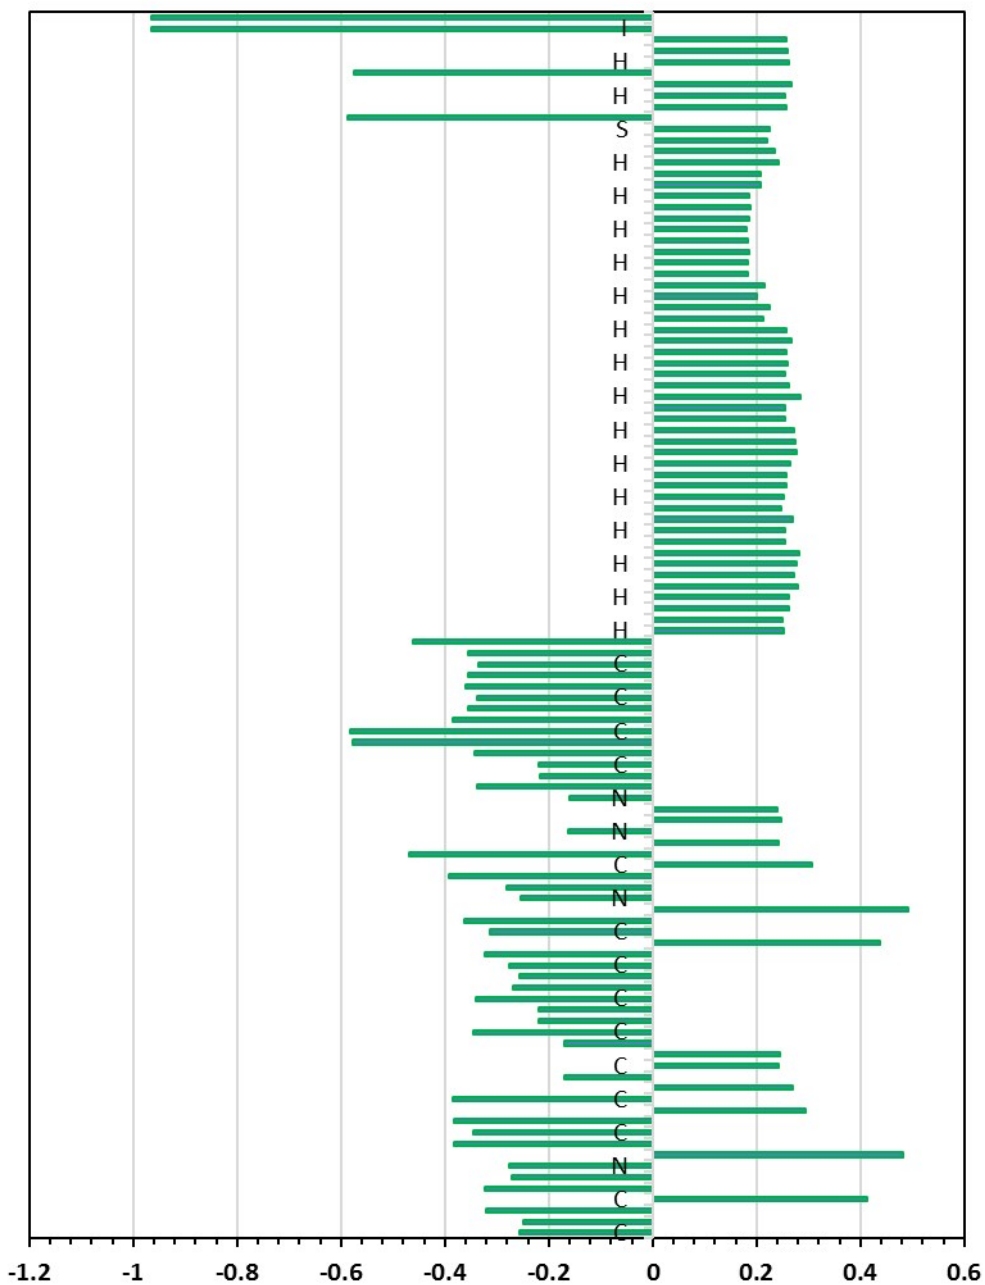

Fig. S8(b). Mulliken charge of SOIC-1



### Mulliken charge of SOIC-2

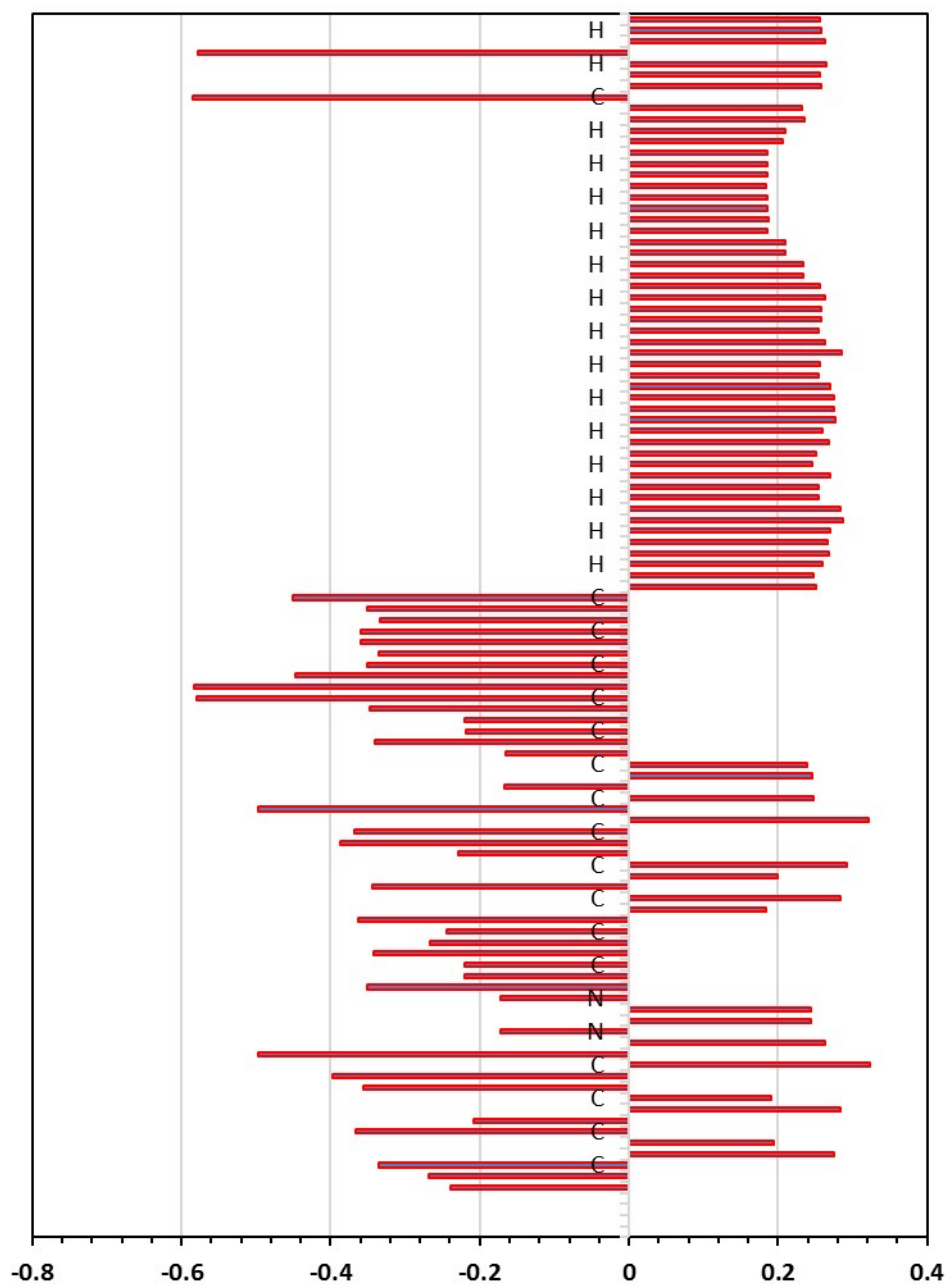

Fig. S8(c). Mulliken charge of SOIC-2

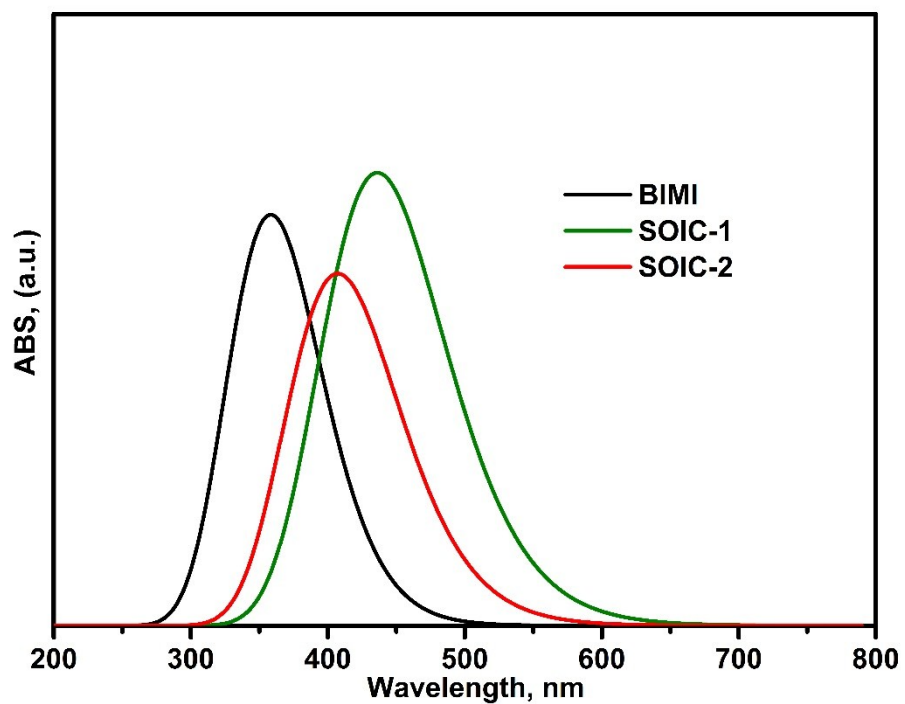

Fig. S9. UV-Vis spectra obtained from TD-DFT calculation.

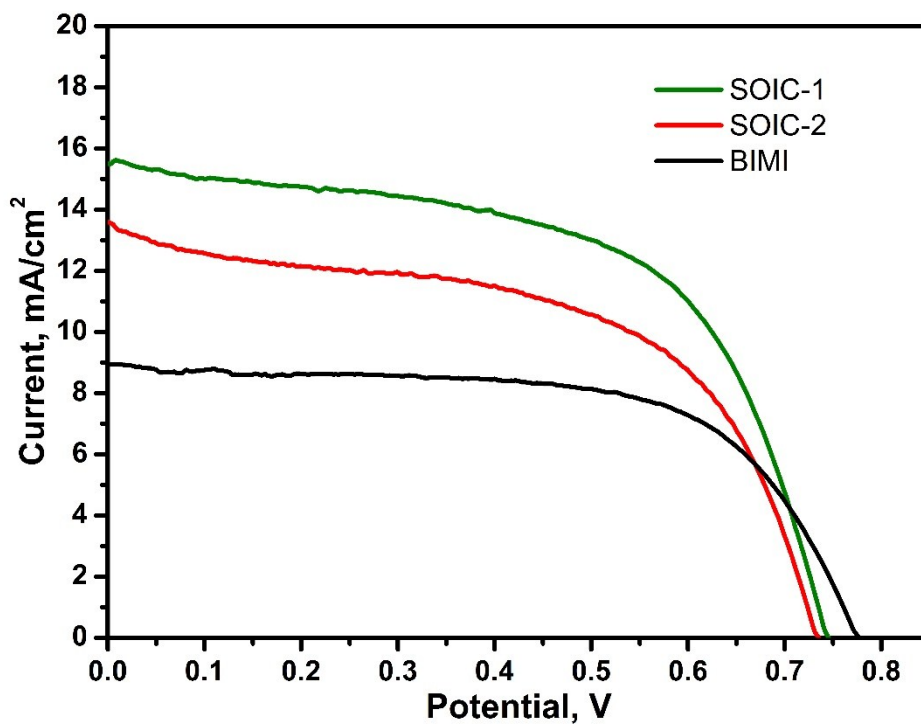

Fig. S10. I-V characteristics of 12 $\mu$ m thick TiO<sub>2</sub> photoanode with SOICs and BIMI electrolytes based ss-DSSCs

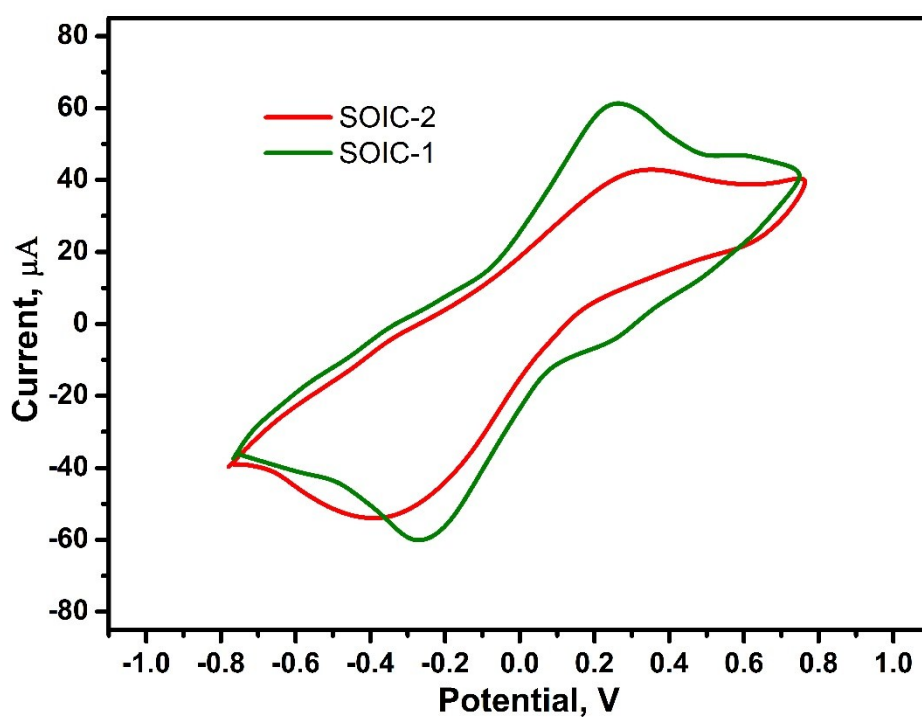

Fig. S11. Solid cyclic voltammetry of SOIC-1 and SOIC-2.

Table S2. Molar extinction coefficient of sensitizer (SK3) and electrolyte (SOICs)

| Sample     | $\lambda_{\text{MAX}}$ (nm) | $\epsilon$ ( $\text{M}^{-1}, \text{cm}^{-1}$ ) |
|------------|-----------------------------|------------------------------------------------|
| SOIC-1     | 377                         | 30,076                                         |
| SOIC-2     | 351                         | 29,766                                         |
| SK-3       | 435                         | 17,000                                         |
| SOIC-1/SK3 | 354,426                     | 48,733                                         |
| SOIC-2/SK3 | 357, 431                    | 44,166                                         |

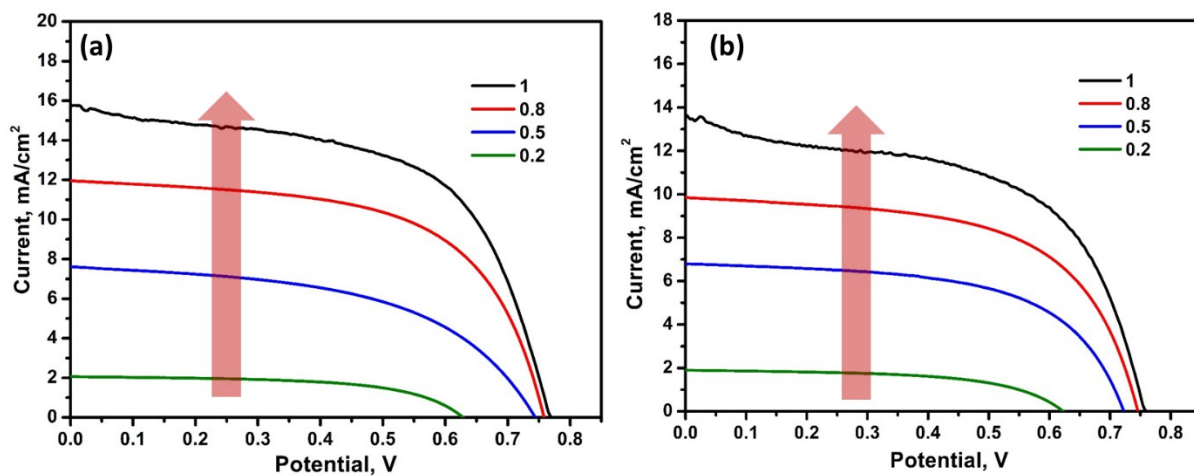

Fig. S12. Influence of illumination on the  $I$ - $V$  characteristics of ss-DSSC with SOIC-1 and 2.

Table S3. Photovoltaic parameters of ss-DSSCs at different illumination Intensities

| Devices | Illumination (mW/cm <sup>2</sup> ) | $J_{sc}$ (mA/cm <sup>2</sup> ) | $V_{oc}$ (mV) | $P_{MAX}$ | FF (%) | PCE (%) |
|---------|------------------------------------|--------------------------------|---------------|-----------|--------|---------|
| SOIC-1  | 100                                | 15.8                           | 769           | 7.06      | 58     | 7.10    |
|         | 80                                 | 11.8                           | 757           | 5.39      | 60     | 6.74    |
|         | 50                                 | 7.65                           | 743           | 2.90      | 51     | 5.79    |
|         | 20                                 | 2.01                           | 628           | 0.68      | 53     | 3.34    |
| SOIC-2  | 100                                | 13.7                           | 759           | 5.69      | 57     | 5.72    |
|         | 80                                 | 9.80                           | 745           | 4.32      | 59     | 5.38    |
|         | 50                                 | 6.79                           | 722           | 2.72      | 55     | 5.39    |
|         | 20                                 | 1.92                           | 625           | 0.63      | 52     | 3.12    |

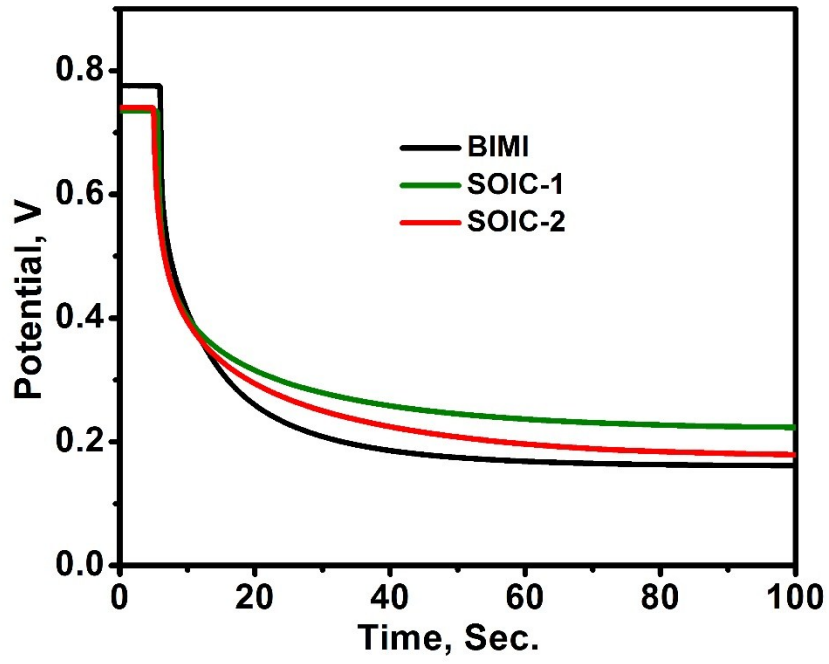

Fig. S13. Open circuit voltage decay curves of ss-DSSCs
